# Supplementary material
Source: PubMed Central journal article supplement (PMC10369173)

**Supplemental Table 1. Inclusion/Exclusion Criteria****Inclusion Criteria**

|                               |                                                                                                                                                  |
|-------------------------------|--------------------------------------------------------------------------------------------------------------------------------------------------|
| <i>Age</i>                    | 21-55 years old (verified with driver's license)                                                                                                 |
| <i>Cocaine Use (Disorder)</i> | DSM-IV criteria for cocaine abuse or dependence; temperature-tested urine drug screen (UDS) positive for cocaine metabolites ( $\geq 300$ ng/ml) |
| <i>Cardiovascular</i>         | Normal resting BP (systolic: 80-160 mmHg; diastolic: 50-95 mmHg), HR (50-90 bpm), and ECG (cardiologist evaluated)                               |
| <i>Cognition</i>              | Shipley Institute of Living Scale (Zachary, 1991) total IQ score $\geq 80$                                                                       |

**Exclusion Criteria**

|                                 |                                                                                                                                                                                                                                                                                                                                                                                   |
|---------------------------------|-----------------------------------------------------------------------------------------------------------------------------------------------------------------------------------------------------------------------------------------------------------------------------------------------------------------------------------------------------------------------------------|
| <i>Substance Use (Disorder)</i> | UDS positive for opioids, methadone, amphetamines, or barbiturates ( $\geq 300$ ng/ml). UDS positive for benzodiazepines ( $\geq 300$ ng/ml) or THC ( $\geq 50$ ng/ml) allowed. Met DSM-IV criteria for dependence on alcohol, sedatives or marijuana; or DSM-IV abuse of alcohol or sedatives. Currently being treated, or desire to be treated, for any substance use disorder. |
| <i>Physical Health Problems</i> | Self-reported cardiovascular, pulmonary, systemic, or neurological conditions. Exposed during the past 30 days to medications that would increase study risk.                                                                                                                                                                                                                     |
| <i>Psychiatric Conditions</i>   | Met DSM-IV criteria for current serious psychiatric illness (e.g. psychosis, bipolar, suicide attempts, major depression not substance-induced)                                                                                                                                                                                                                                   |
| <i>Dietary</i>                  | Self-reported lactose intolerance (placebo dose)                                                                                                                                                                                                                                                                                                                                  |
| <i>Pregnancy</i>                | Urine positive for pregnancy (females only), self-reported lactation/breast-feeding, or heterosexually active and not using medically approved birth control (self-reported)                                                                                                                                                                                                      |

**Supplemental Table 2.** Measures of Cocaine-Seeking Behavior

|                         | <i>Placebo</i>         |                |                        |                | <i>N-acetylcysteine</i> |                |                        |                |
|-------------------------|------------------------|----------------|------------------------|----------------|-------------------------|----------------|------------------------|----------------|
|                         | <i>Placebo-priming</i> |                | <i>Cocaine-priming</i> |                | <i>Placebo-priming</i>  |                | <i>Cocaine-priming</i> |                |
|                         | <i>\$0.50</i>          | <i>\$1.50</i>  | <i>\$0.50</i>          | <i>\$1.50</i>  | <i>\$0.50</i>           | <i>\$1.50</i>  | <i>\$0.50</i>          | <i>\$1.50</i>  |
| Cocaine breakpoints     | 2833<br>(1061)         | 1210<br>(460)  | 5580<br>(1357)         | 3835<br>(1403) | 2957<br>(1042)          | 1371<br>(591)  | 2996<br>(912)          | 1516<br>(763)  |
| Total # cocaine choices | 4.92<br>(0.98)         | 3.33<br>(0.76) | 7.25<br>(0.92)         | 4.92<br>(1.28) | 4.83<br>(1.07)          | 3.50<br>(0.78) | 5.25<br>(0.95)         | 3.33<br>(0.90) |

Note: Means  $\pm$  1 Standard Error of the Mean (SEM) are presented in each cell. Significant effects are described in the text.

**Supplemental Table 3:** Spectra Quality Metrics

|         | SNR        | FWHM          | CRLB% GLU | CRLB% GLN  |
|---------|------------|---------------|-----------|------------|
| Placebo | 18.4 (4.0) | 0.046 (0.008) | 4.6 (1.1) | 13.1 (3.0) |
| NAC     | 17.3 (2.8) | 0.049 (0.008) | 4.4 (0.5) | 16.1 (7.7) |

Note: Means ( $\pm$  1 Standard Deviation) are presented. No significant differences for placebo vs. N-acetylcysteine (NAC) were observed ( $p$ s > .45). SNR = Signal-to-Noise ratio; FWHM = full-width half-maximum (ppm); CRLB% = Cramer-Rao Lower Bound %; GLU = Glutamate; GLN = Glutamine.

**Supplemental Table 4.** Statistical Summary of Cocaine Priming Effects

| Measure                              | Priming X Time<br><i>F</i> ( <i>p</i> ) | NAC<br><i>F</i> ( <i>p</i> ) | NAC x Priming<br><i>F</i> ( <i>p</i> ) |
|--------------------------------------|-----------------------------------------|------------------------------|----------------------------------------|
| Heart rate                           | 18.98 (.001) ↑                          | -                            | -                                      |
| Systolic BP                          | 22.09 (.001) ↑                          | -                            | -                                      |
| Diastolic BP                         | 23.14 (.001) ↑                          | -                            | -                                      |
| Oxygen saturation                    | -                                       | 9.52 (.01) ↓                 | -                                      |
| Good drug effect VAS                 | 18.51 (.001) ↑                          | -                            | -                                      |
| Drug high VAS                        | 16.45 (.002) ↑                          | -                            | -                                      |
| Drug liking VAS                      | 16.67 (.002) ↑                          | -                            | -                                      |
| Stimulated VAS                       | 18.96 (.001) ↑                          | -                            | -                                      |
| Want drug again VAS                  | 10.47 (.008) ↑                          | -                            | -                                      |
| SSARS scale                          | 21.59 (.001) ↑                          | -                            | -                                      |
| CCQ anticipation of positive outcome | -                                       | -                            | -                                      |
| CCQ anticipation of relief           | -                                       | -                            | -                                      |
| CCQ desire to use                    | -                                       | -                            | -                                      |
| CCQ lack of control over use         | -                                       | -                            | 10.30 (.01) ↓                          |
| CCQ planning/intention to use        | -                                       | -                            | -                                      |

Note: Arrows highlight significant *F*-test values that survived Bonferroni-corrected threshold for each measure category (physiological,  $p < .012$ ; VAS,  $p < .01$ ; and CCQ,  $p < .01$ ) and denote the direction of the effect. For the Cocaine Priming X Time interaction, ↑ indicates a greater post-cocaine (than post-placebo) response increase. For the NAC main effect, ↓ indicates that NAC attenuated the effect relative to placebo. For the NAC X Priming interaction, ↓ indicates that NAC attenuated the cocaine-priming effect (relative to that observed under placebo maintenance). BP = blood pressure; CCQ = cocaine craving questionnaire; SSARS = stimulant-sensitive adjective rating scale; VAS = visual analogue scale.

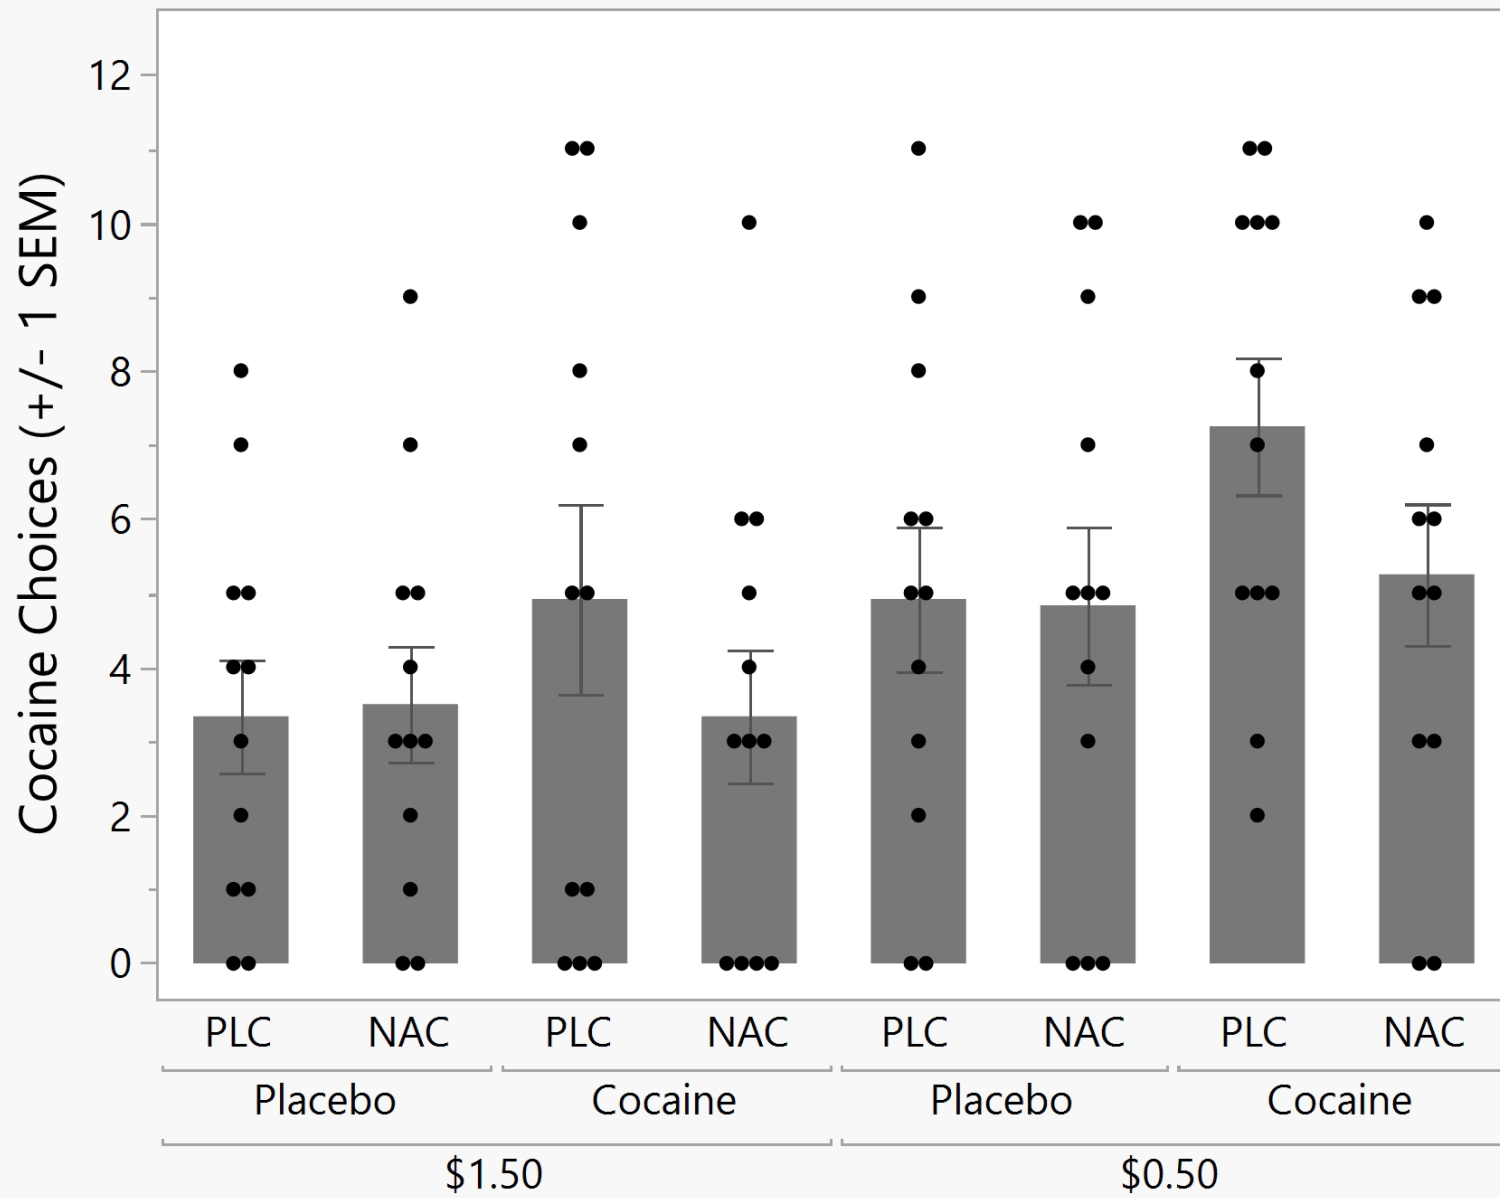

Supplement: NIHMS1915533-supplement-supplemental_information.pdf [file NIHMS1915533-supplement-supplemental_information.pdf]
